# Supplementary material for: Hemin-Induced Endothelial Dysfunction and Endothelial to Mesenchymal Transition in the Pathogenesis of Pulmonary Hypertension Due to Chronic Hemolysis
Source: MDPI journal article supplement (doi:10.3390/ijms23094763), 2022-04-26
Supplement: s1 [file s1]

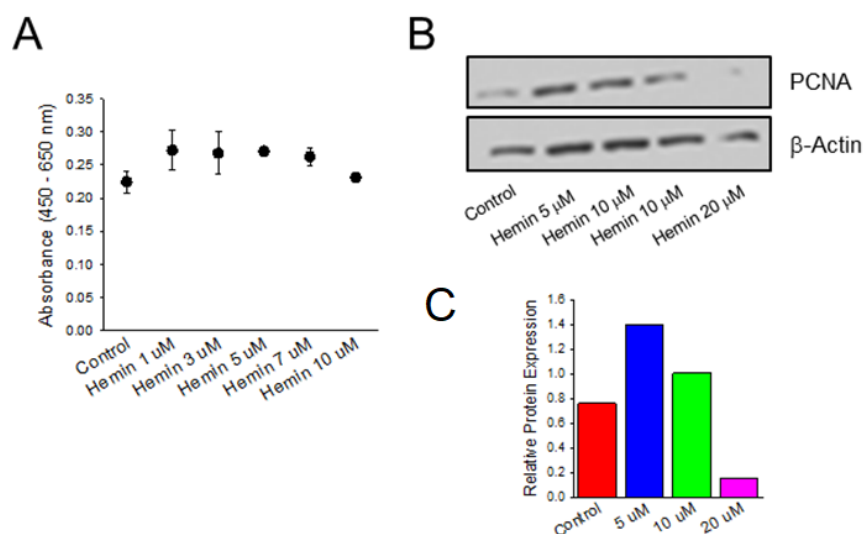

**Figure S1.** Hemin treatment leads to increased pulmonary artery endothelial cell proliferation at specific concentrations. **(A)** Plot depicting absorbance related to WST-1 assay as a measure of cellular proliferation in HPAECs treated for 24-hour duration with hemin at 1  $\mu$ M, 3  $\mu$ M, 5  $\mu$ M, 7  $\mu$ M, and 10  $\mu$ M compared to PBS vehicle,  $n = 3$ . **(B)** Western blot image denoting PCNA protein expression, a marker of cell proliferation, measured between HPAECs treated with hemin 5  $\mu$ M, 10  $\mu$ M, and 20  $\mu$ M compared to PBS vehicle for 24 hours;  $n = 1$ . **(C)** Bar graph summarizing relative PCNA protein expression across the experiment. PCNA indicates proliferating cell nuclear antigen.
